# Supplementary material for: Towards green visible range active photocatalytic Au/TiO2 nanocomposites through rutin-based synthesis and their application in the degradation of ciprofloxacin
Source: Royal Society of Chemistry journal article supplement (doi:10.1039/d4su00186a), 2024-01-01
Supplement: d4su00186a1.pdf [file d4su00186a1.pdf]

## Electronic Supplementary Information

### Towards green visible range active photocatalytic Au/TiO<sub>2</sub> nanocomposites through rutin-based synthesis and their application in the degradation of ciprofloxacin

Inês Catarina Gomes Espada<sup>a,b</sup>, Noelia González-Ballesteros<sup>a,c</sup>, Carlos J. Tavares<sup>a</sup>, Senentxu Lanceros-Méndez<sup>\*a,d,e</sup> and Pedro M. Martins<sup>\*b,f</sup>

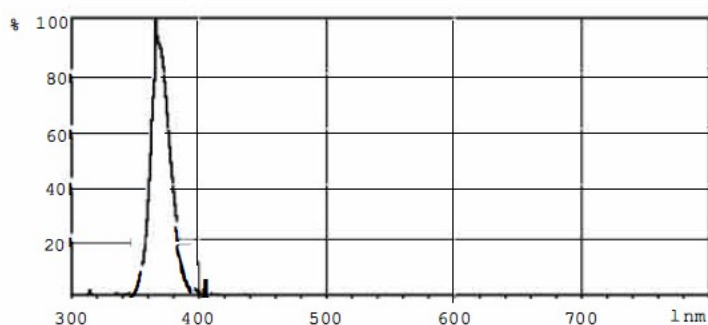

**Figure 1.** UV lamp spectra provided by the manufacturer.

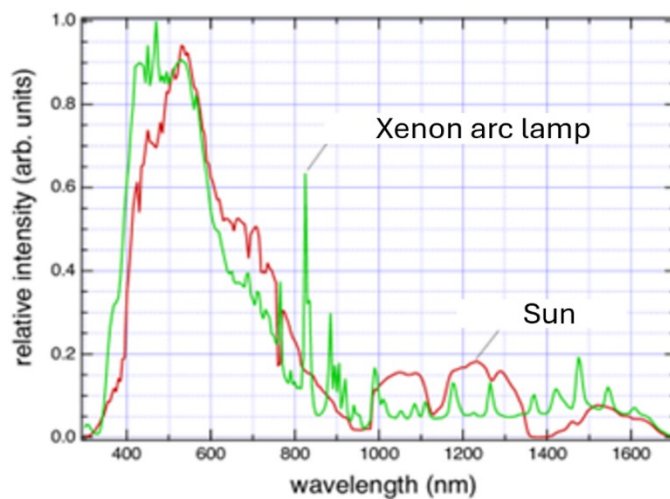

**Figure 2.** Xenon Lamp arc (with UV filter) and sunlight spectra.

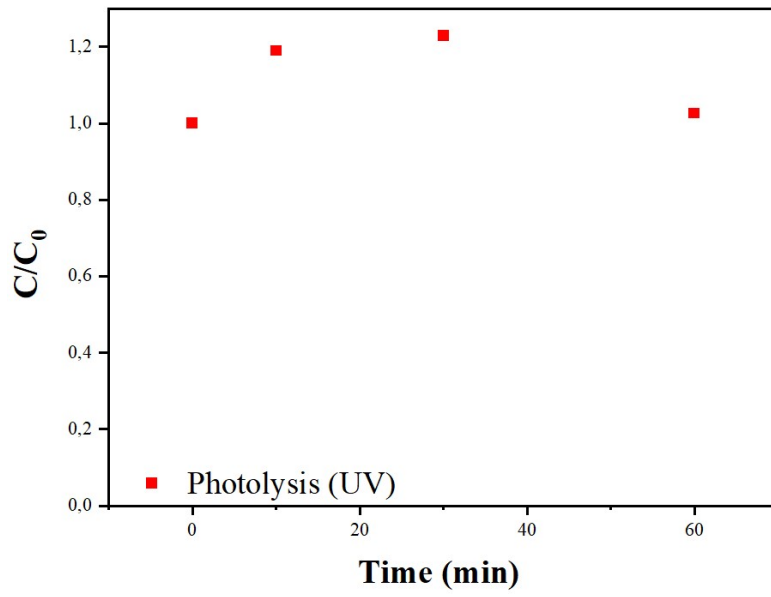

**Figure 3** - Photolysis of CIP (5 mg/L) for 60 minutes under UV radiation.

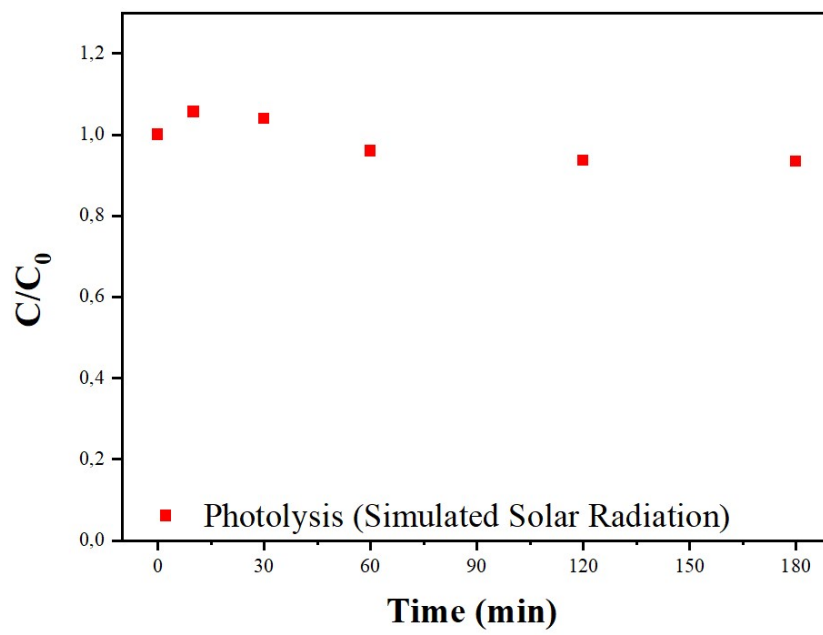

**Figure 4** - Photolysis of CIP (5mg/L) for 180 minutes under simulated solar radiation.

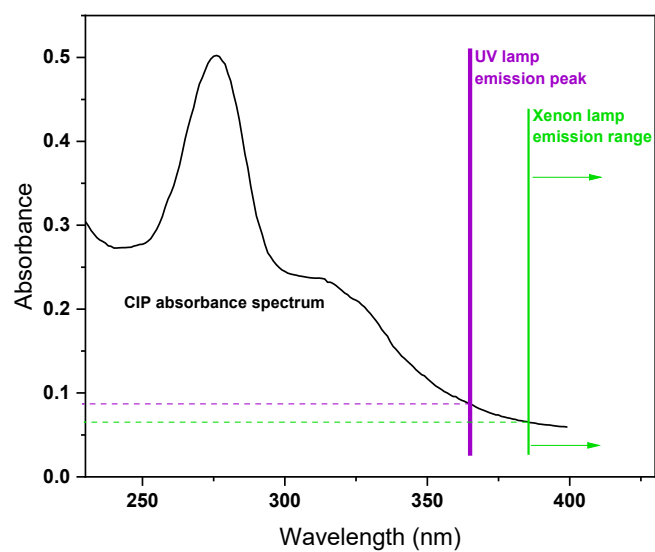

**Figure 5.** Representation of the ciprofloxacin spectra (230 to 400 nm) with the maximum absorbance peaks (~277nm), UV lamp emission peak, and Xenon lamp arc range.
